# Supplementary material for: Unsymmetric Cisplatin-Based Pt(IV) Conjugates Containing a PARP-1 Inhibitor Pharmacophore Tested on Malignant Pleural Mesothelioma Cell Lines
Source: MDPI journal article supplement (doi:10.3390/molecules26164740), 2021-08-05
Supplement: s1 [file s1]

# Unsymmetric cisplatin-based Pt(IV) conjugates containing a PARP-1 inhibitor pharmacophore tested on malignant pleural mesothelioma cell lines

Elisabetta Gabano<sup>1</sup>, Giulia Pinton<sup>2</sup>, Cecilia Balzano<sup>1,2</sup>, Sara Boumya<sup>2</sup>, Domenico Osella<sup>1</sup>, Laura Moro<sup>2,\*</sup>, Mauro Ravera<sup>1,\*</sup>

<sup>1</sup> Dipartimento di Scienze e Innovazione Tecnologica, Università del Piemonte Orientale, Viale Michel 11, 15121 Alessandria, Italy

<sup>2</sup> Dipartimento di Scienze del Farmaco, Università del Piemonte Orientale, Largo Donegani 2/3, 28100 Novara, Italy

\* Correspondence: LM [laura.moro@uniupo.it](mailto:laura.moro@uniupo.it); MR [mauro.ravera@uniupo.it](mailto:mauro.ravera@uniupo.it)

## SUPPORTING INFORMATION

### **Table of content:**

**Figure S1.** Sketch of the compounds under investigation and numbering scheme for NMR assignment.

**Figure S2-Figure S7.** ESI-MS and NMR characterization of **3**.

**Figure S8-Figure S13.** ESI-MS and NMR characterization of **5**.

**Figure S14-Figure S19.** ESI-MS and NMR characterization of **6**.

**Figure S20-Figure S25.** ESI-MS and NMR characterization of **7**.

**Figure S26-Figure S31.** ESI-MS and NMR characterization of **8**.

**Figure S32-Figure S37.** ESI-MS and NMR characterization of **9**.

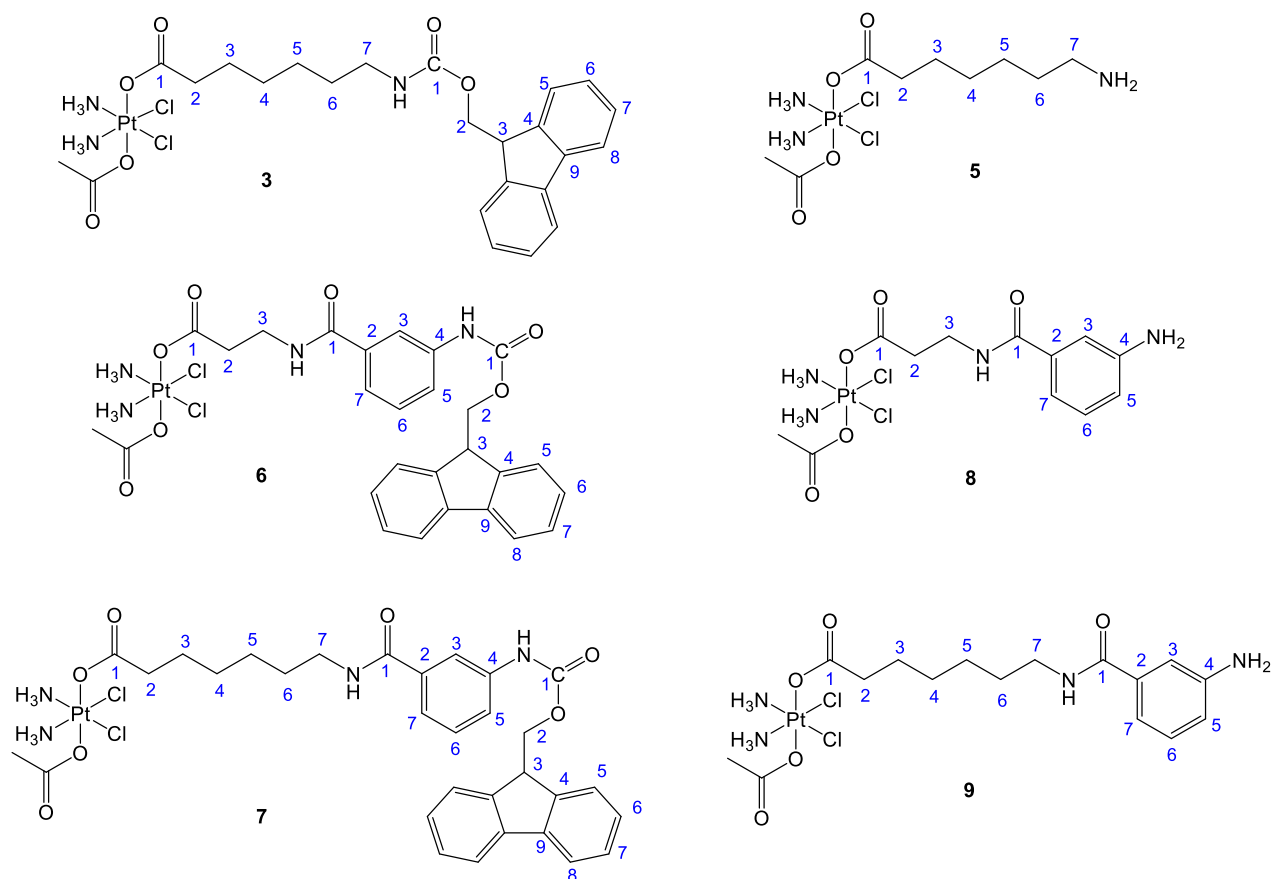

**Figure S1.** Sketch of the compounds under investigation and numbering scheme for NMR assignment. The assignment includes numbers and codes for the different portions of the molecules: Ac = acetate, AH = 7-aminoheptanoic acid,  $\beta$ A =  $\beta$ -alanine, F = Fmoc, Bz = 3-aminobenzoic acid.

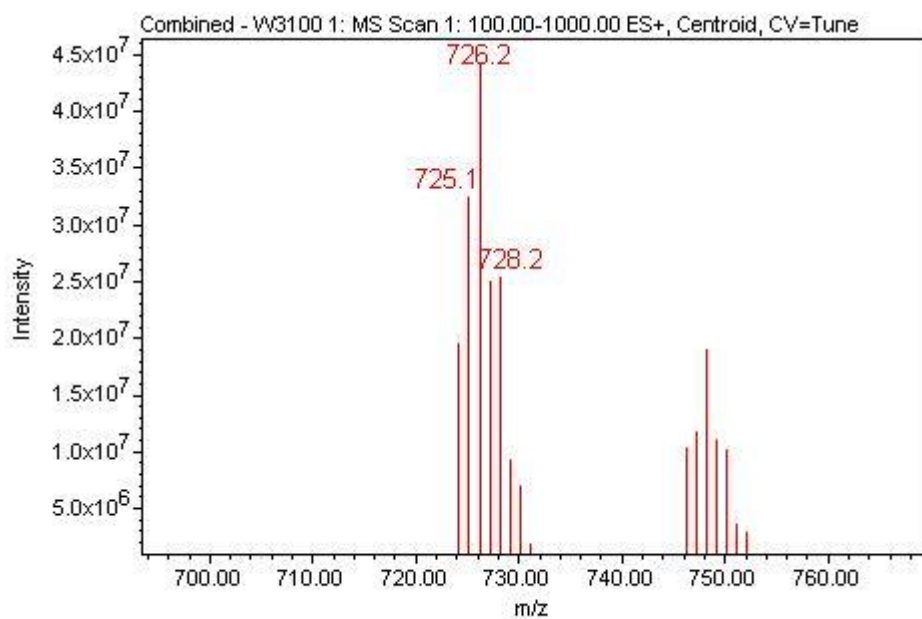

**Figure S2.** ESI-MS spectrum of complex **3**.

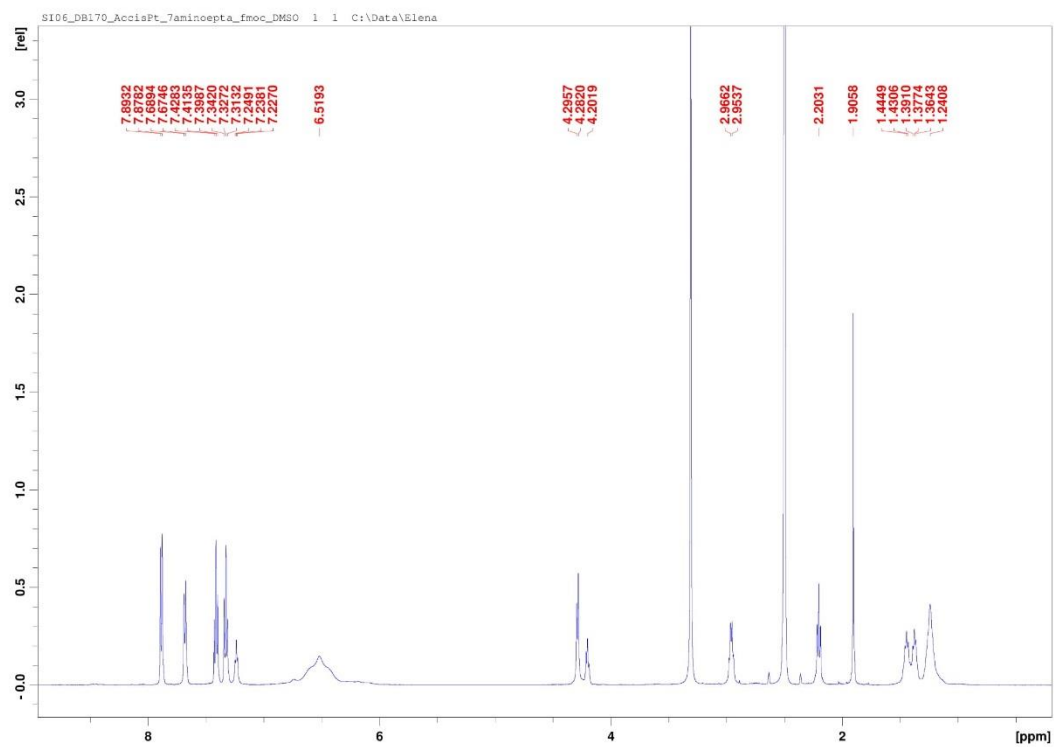

**Figure S3.** <sup>1</sup>H NMR spectrum of complex **3**.

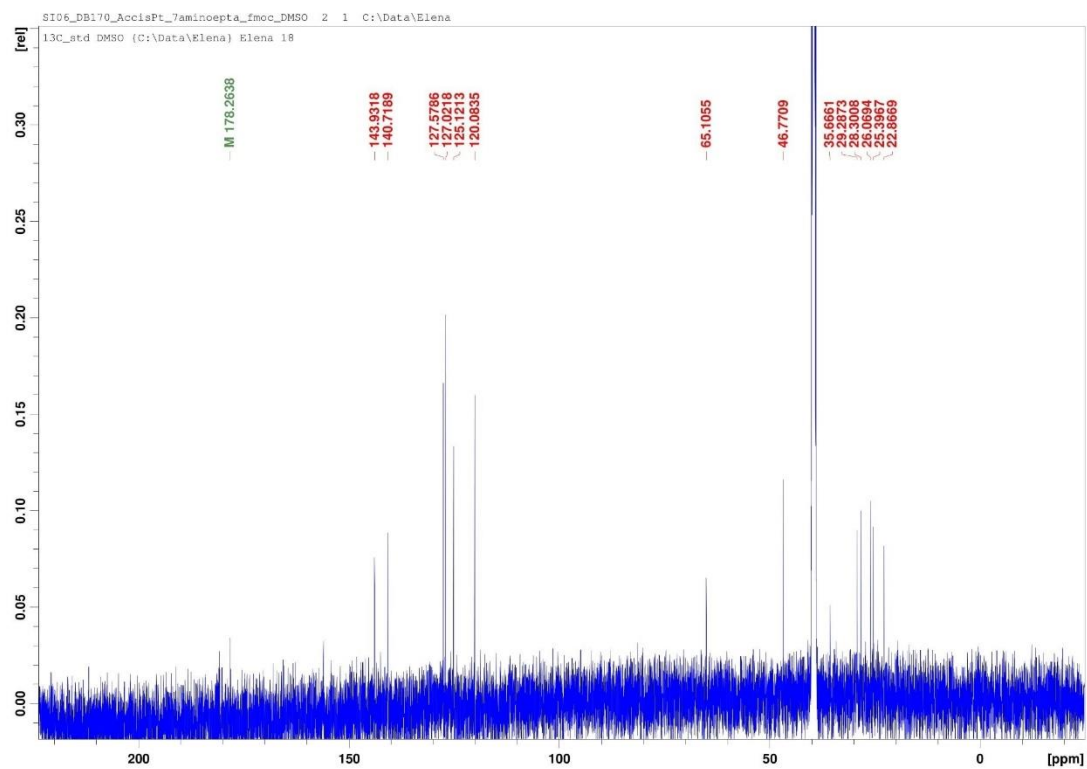

**Figure S4.**  $^{13}\text{C}$  NMR spectrum of complex **3**.

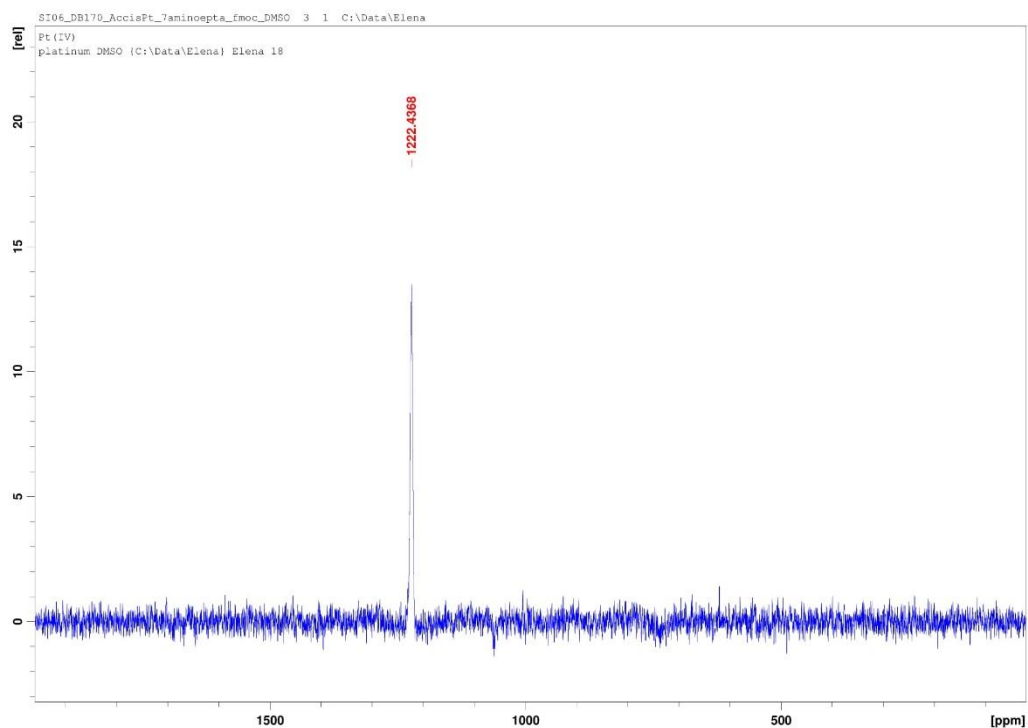

**Figure S5.**  $^{195}\text{Pt}$  NMR spectrum of complex **3**.

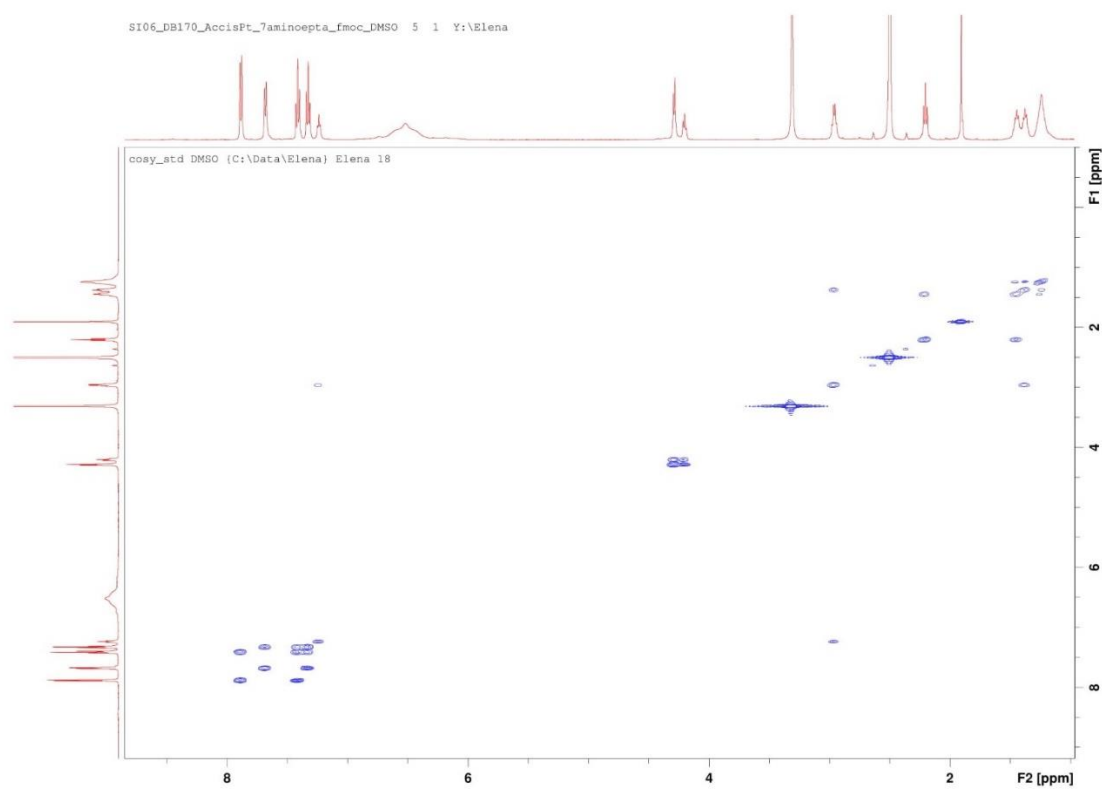

**Figure S6.** [ $^1\text{H}$ ,  $^1\text{H}$ ] COSY NMR spectrum of complex **3**.

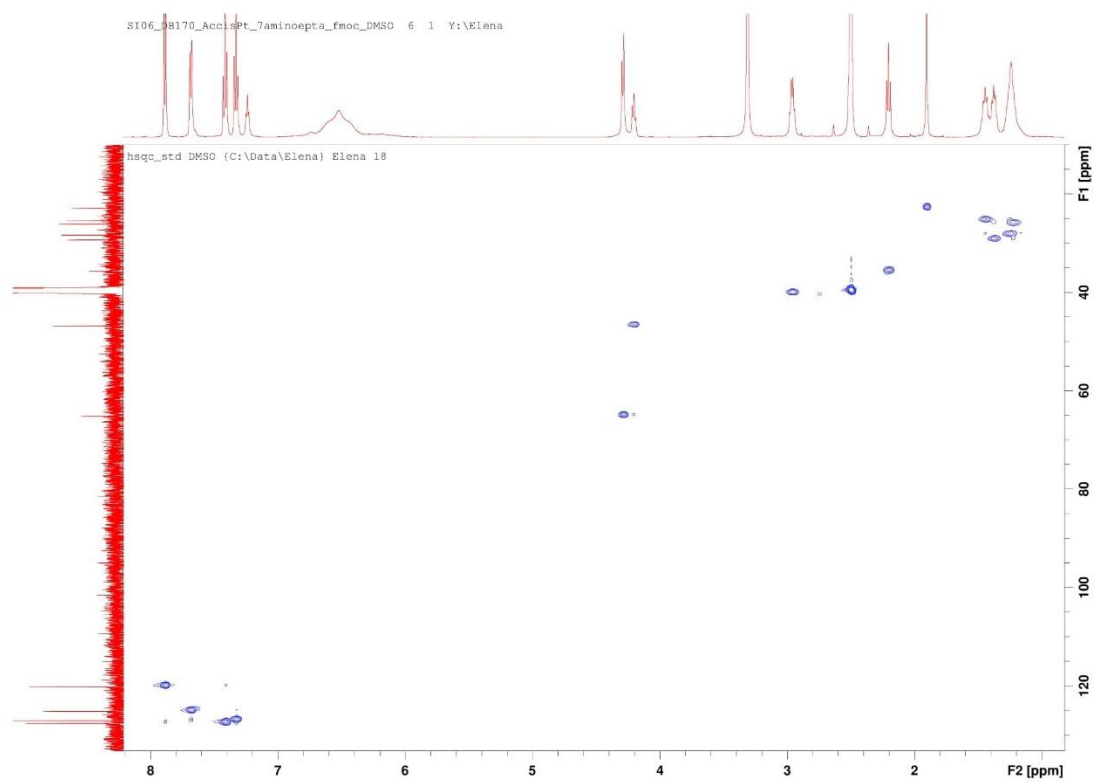

**Figure S7.** [ $^1\text{H}$ ,  $^{13}\text{C}$ ] HSQC NMR spectrum of complex **3**.

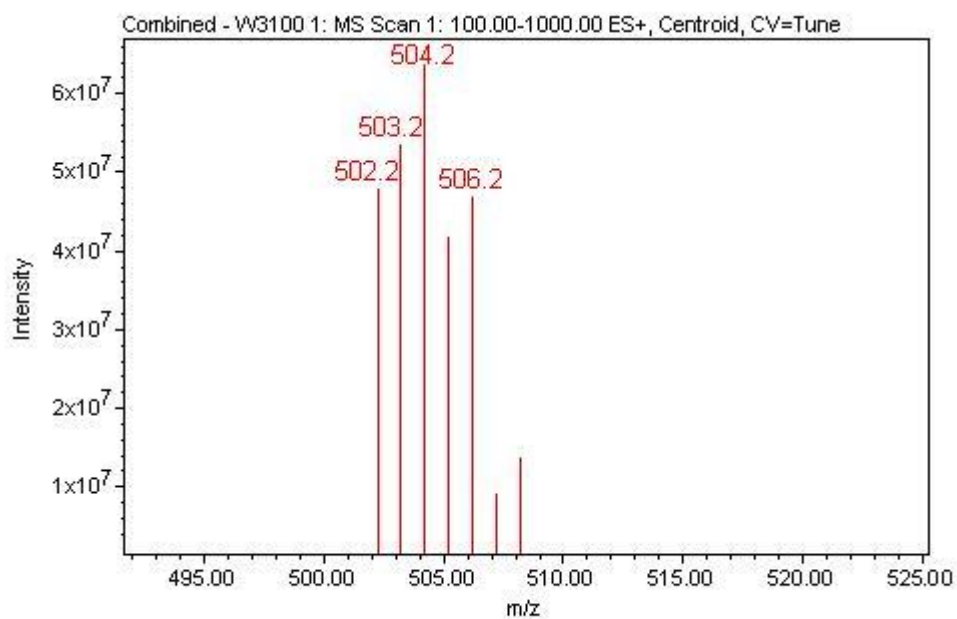

**Figure S8.** ESI-MS spectrum of complex **5**.

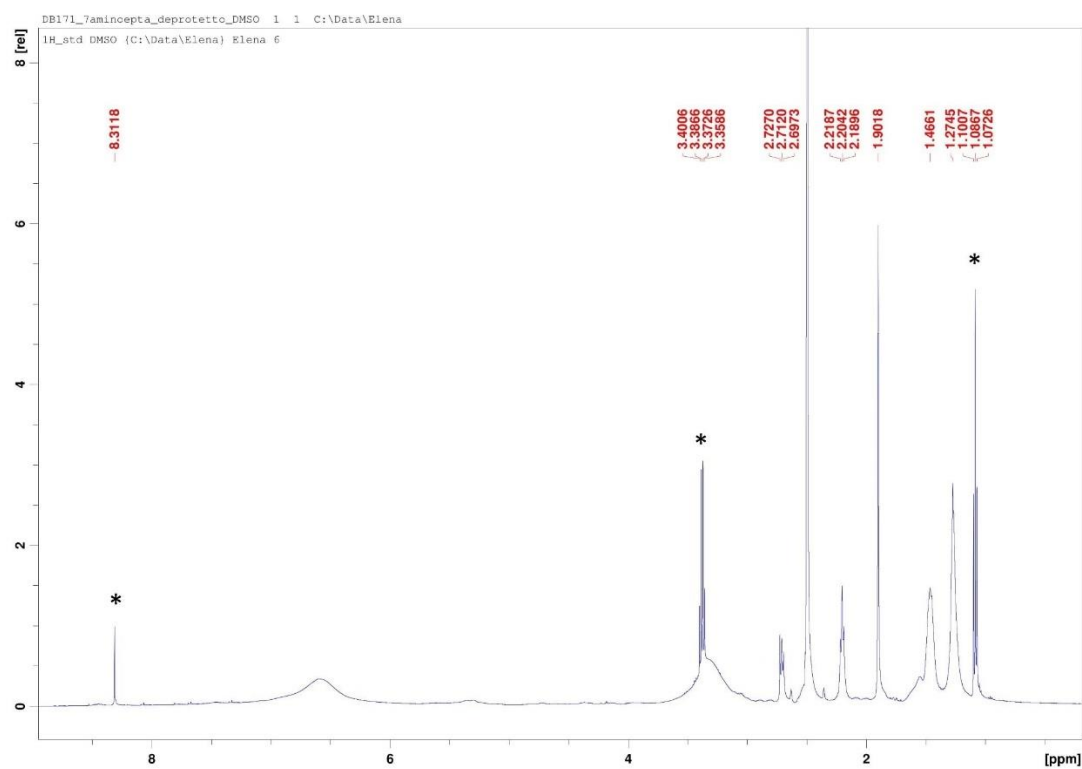

**Figure S9.** <sup>1</sup>H NMR spectrum of complex **5**. The signals of residual diethyl ether and chloroform are also visible (\*).

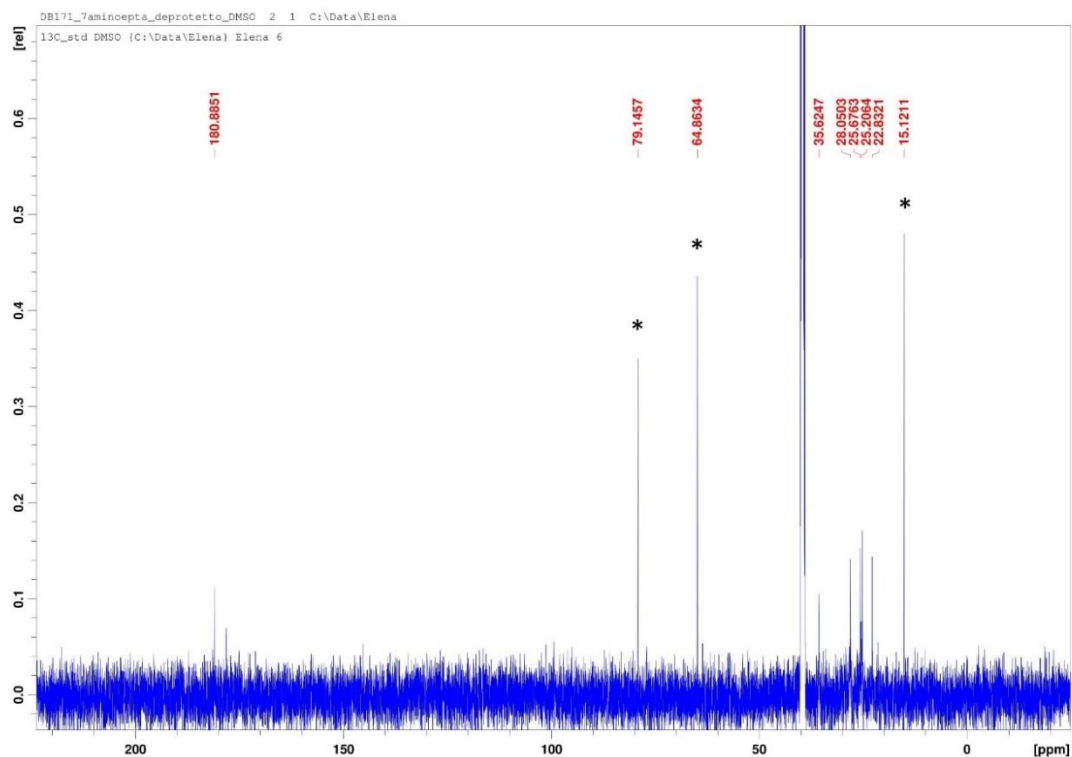

**Figure S10.**  $^{13}\text{C}$  NMR spectrum of complex **5**. The signals of residual diethyl ether and chloroform are also visible (\*).

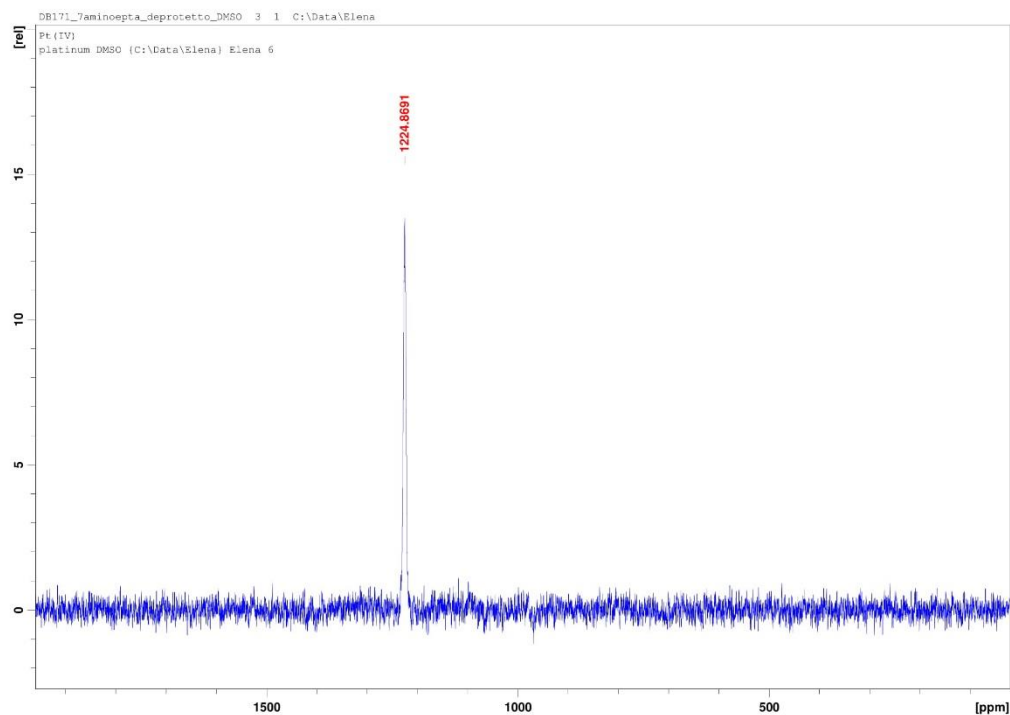

**Figure S11.**  $^{195}\text{Pt}$  NMR spectrum of complex **5**.

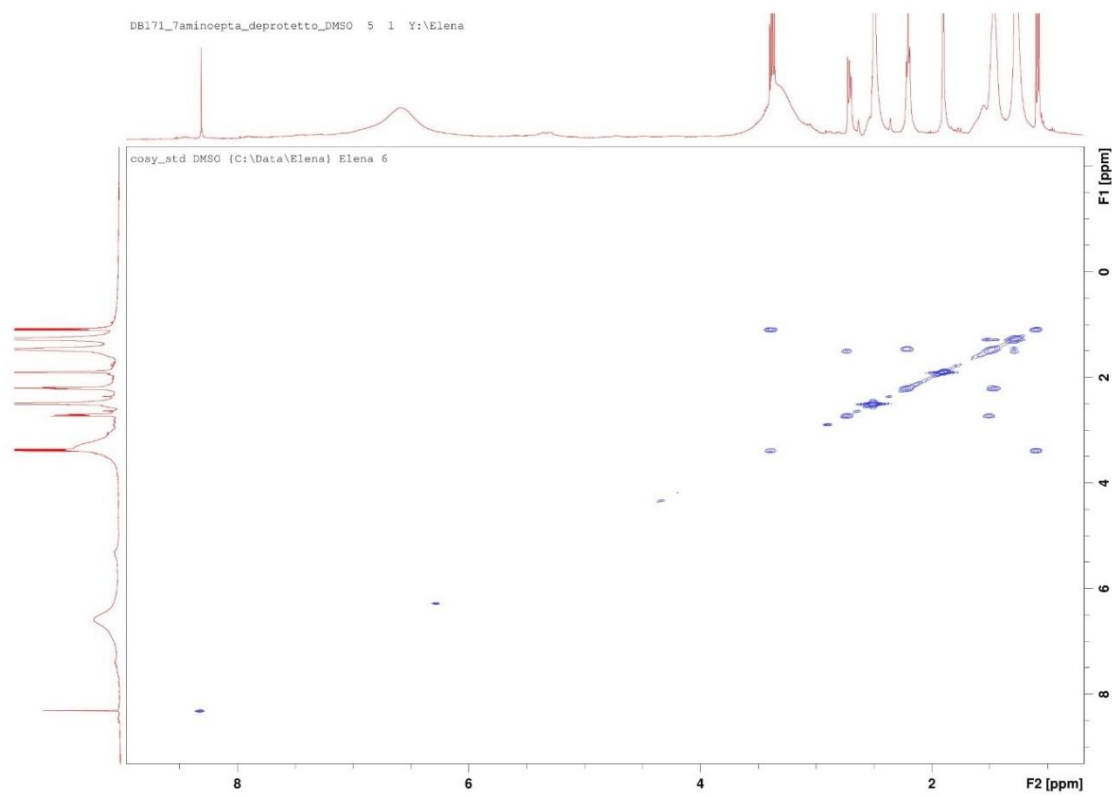

**Figure S12.** [ $^1\text{H}$ ,  $^1\text{H}$ ] COSY NMR spectrum of complex **5**.

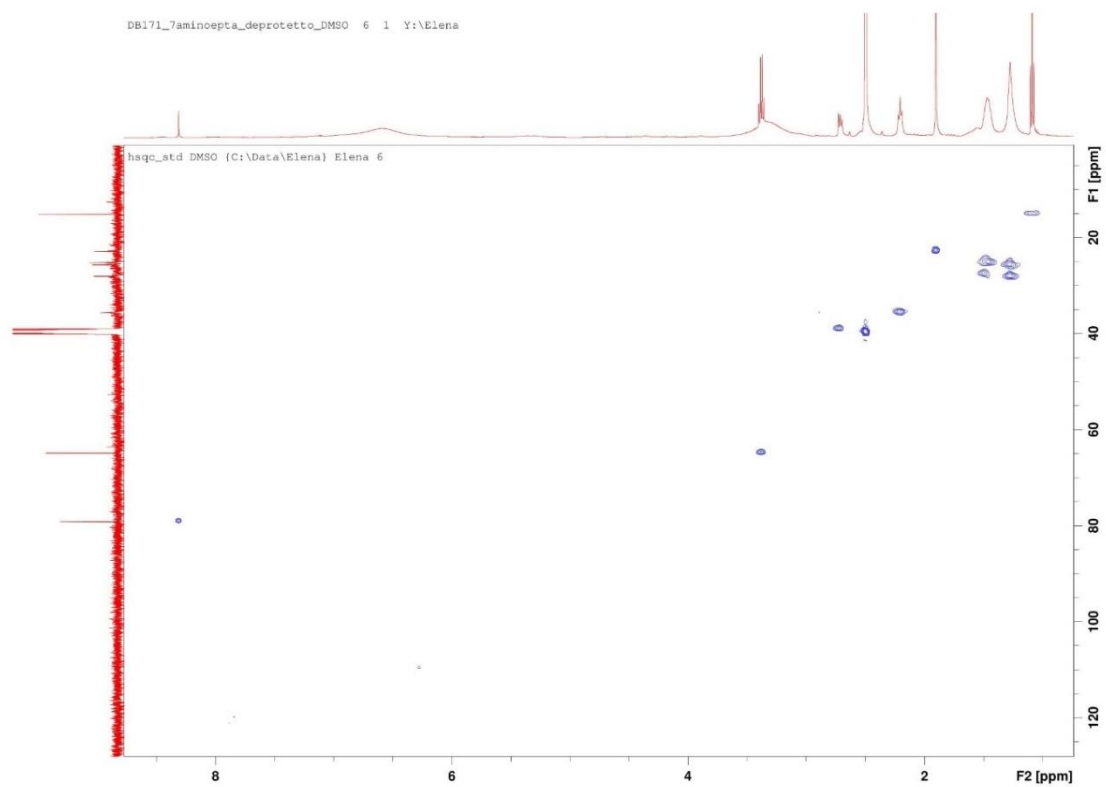

**Figure S13.** [ $^1\text{H}$ ,  $^{13}\text{C}$ ] HSQC NMR spectrum of complex **5**.



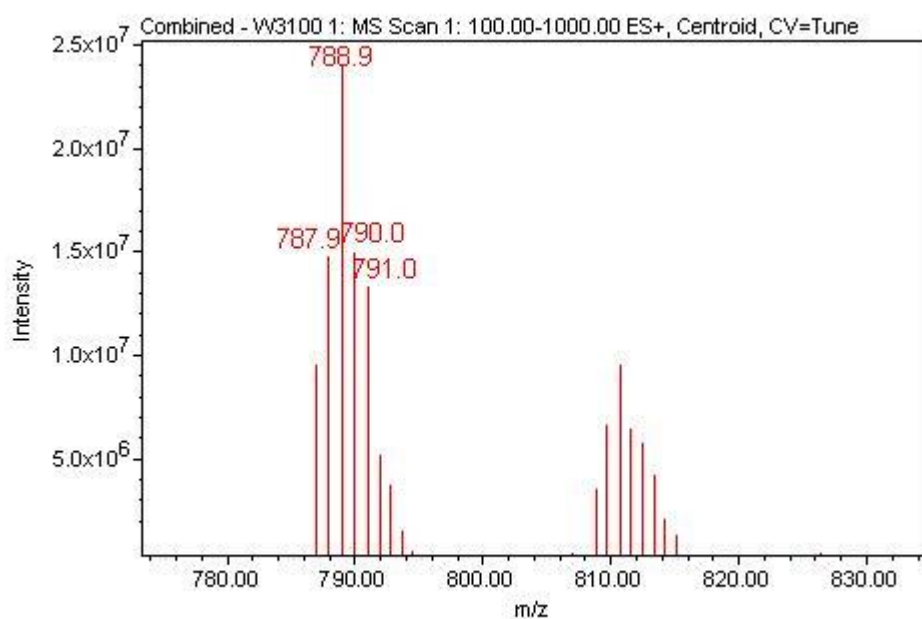

**Figure S14.** ESI-MS spectrum of complex **6**.

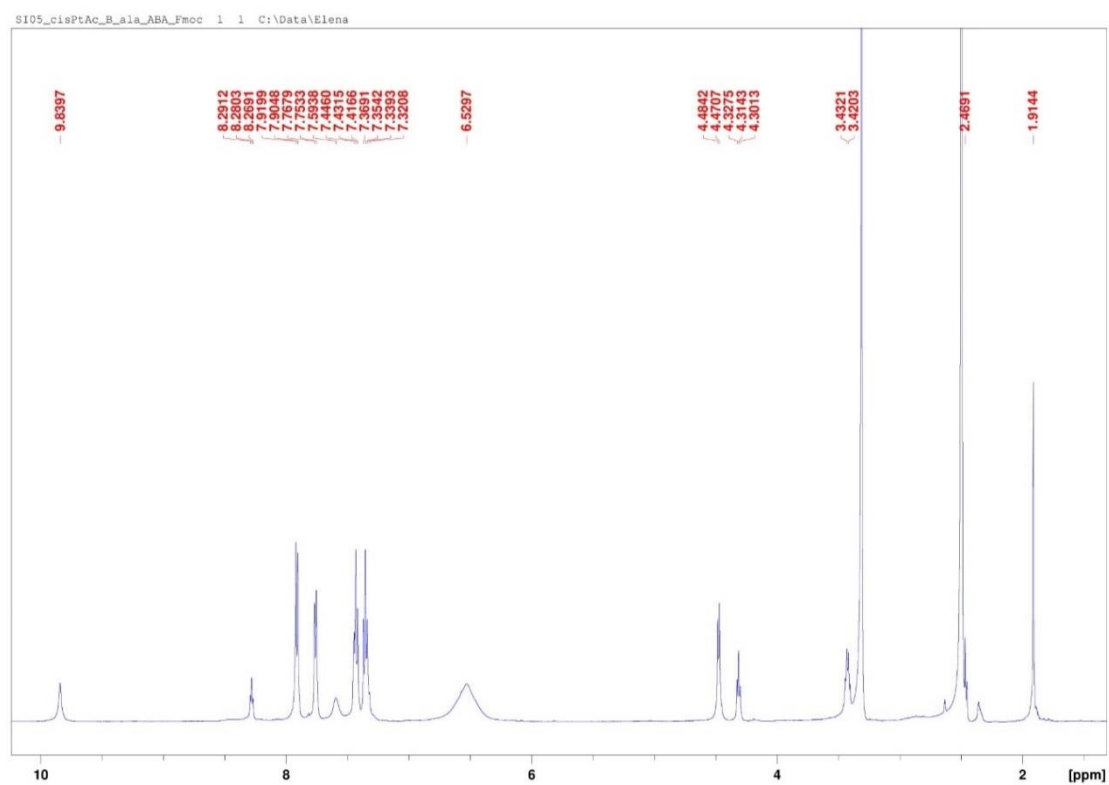

**Figure S15.** <sup>1</sup>H NMR spectrum of complex **6**.

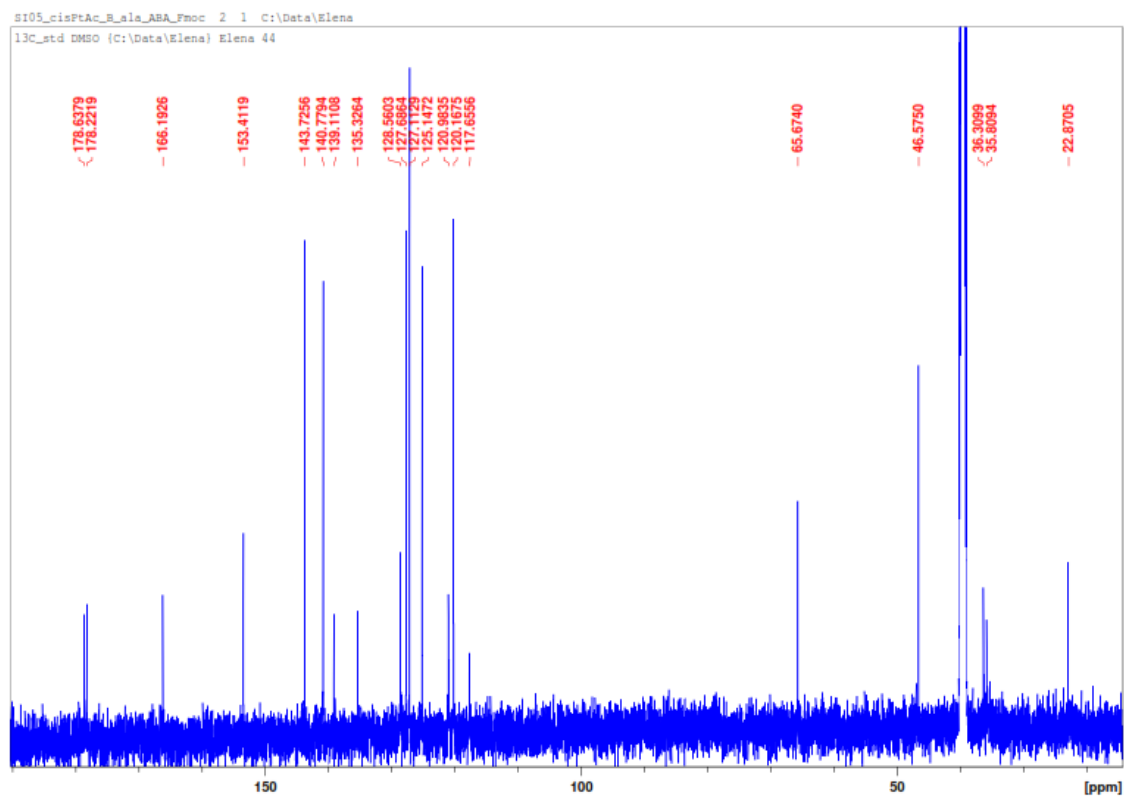

**Figure S16.**  $^{13}\text{C}$  NMR spectrum of complex **6**.

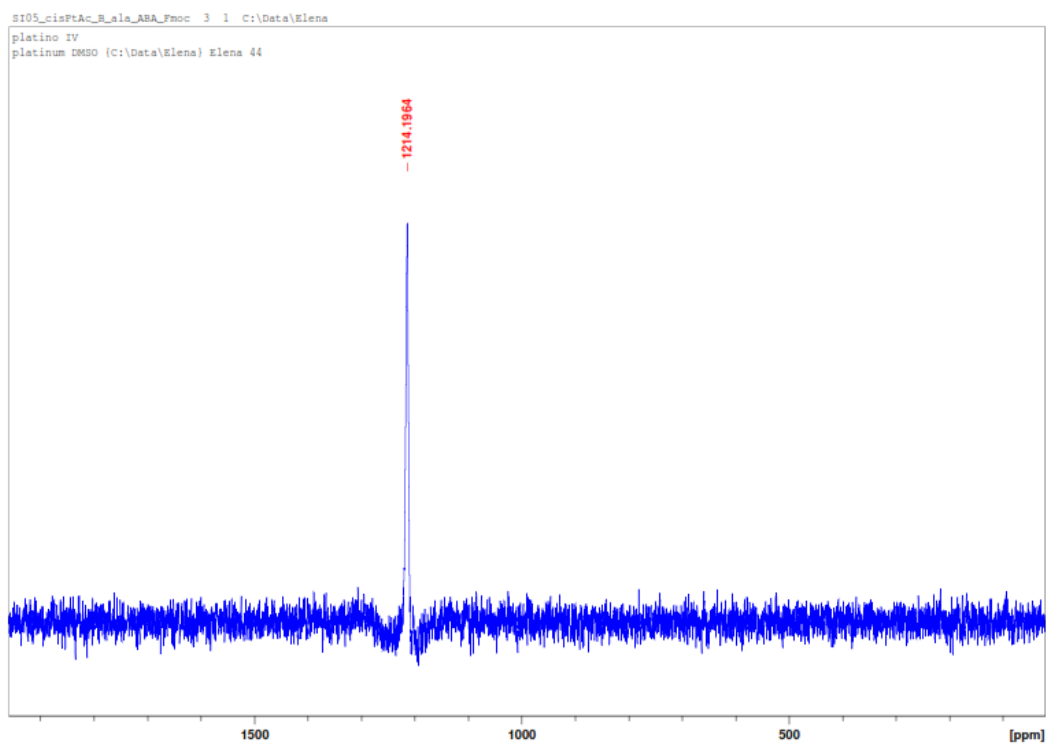

**Figure S17.**  $^{195}\text{Pt}$  NMR spectrum of complex **6**.

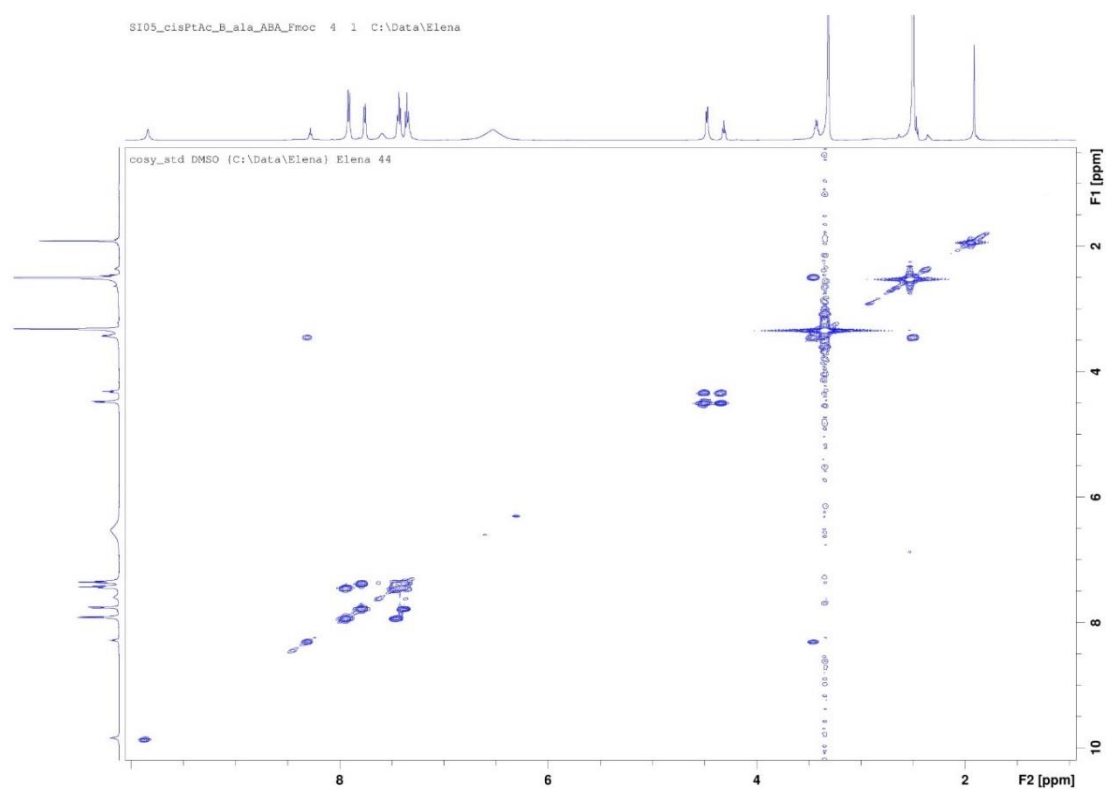

**Figure S18.** [ $^1\text{H}$ ,  $^1\text{H}$ ] COSY NMR spectrum of complex **6**.

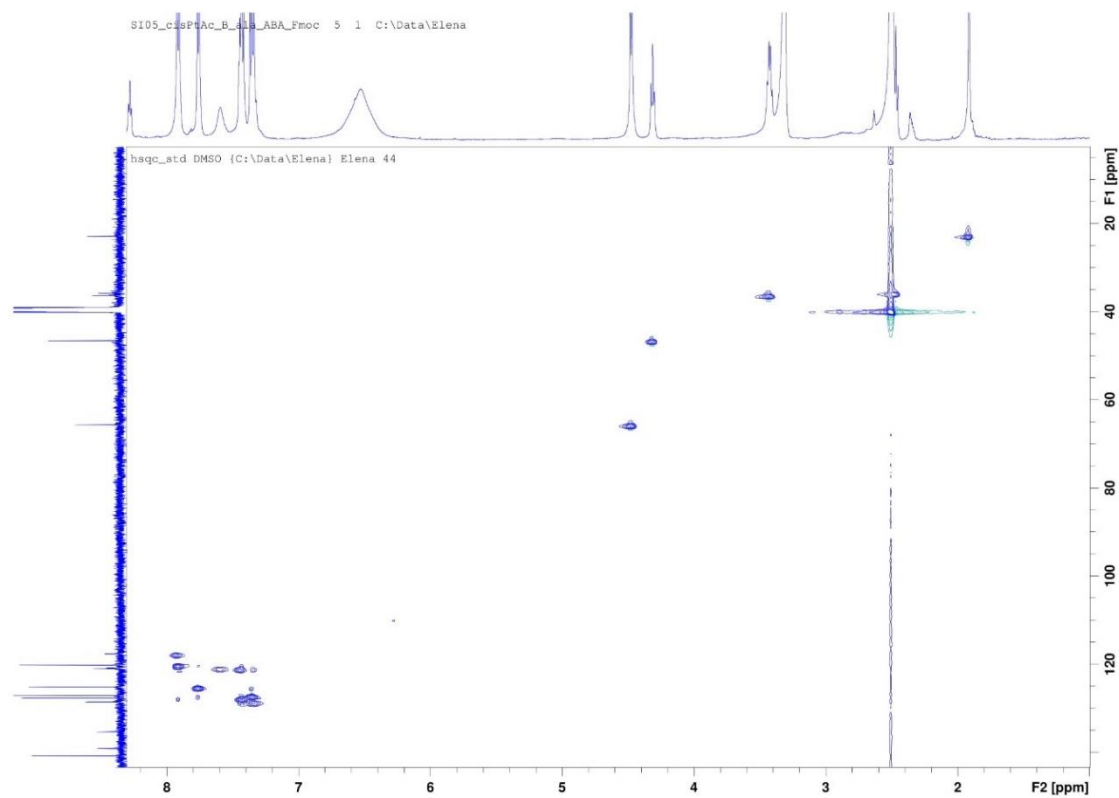

**Figure S19.** [ $^1\text{H}$ ,  $^{13}\text{C}$ ] HSQC NMR spectrum of complex **6**.

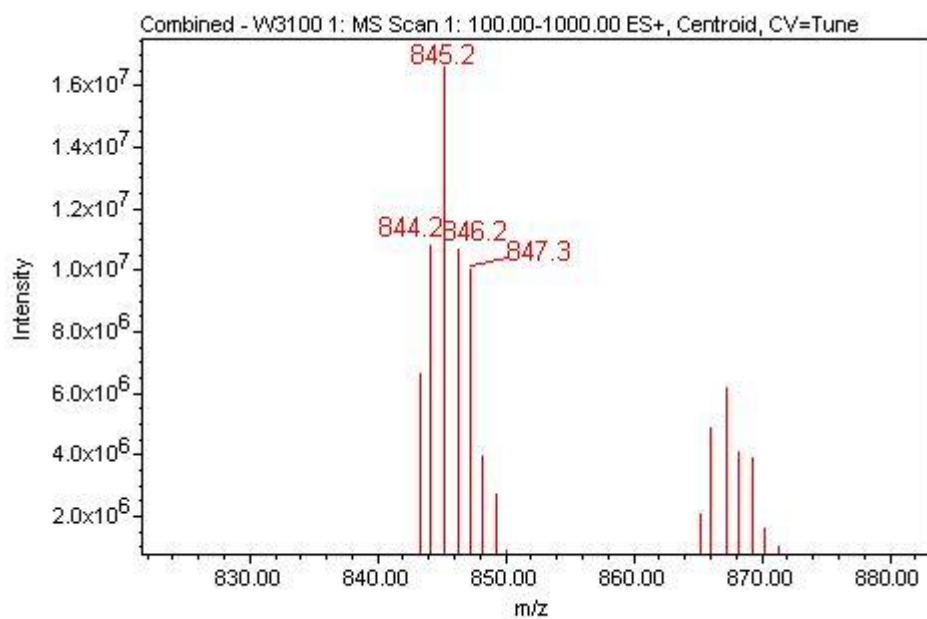

**Figure S20.** ESI-MS spectrum of complex **7**.

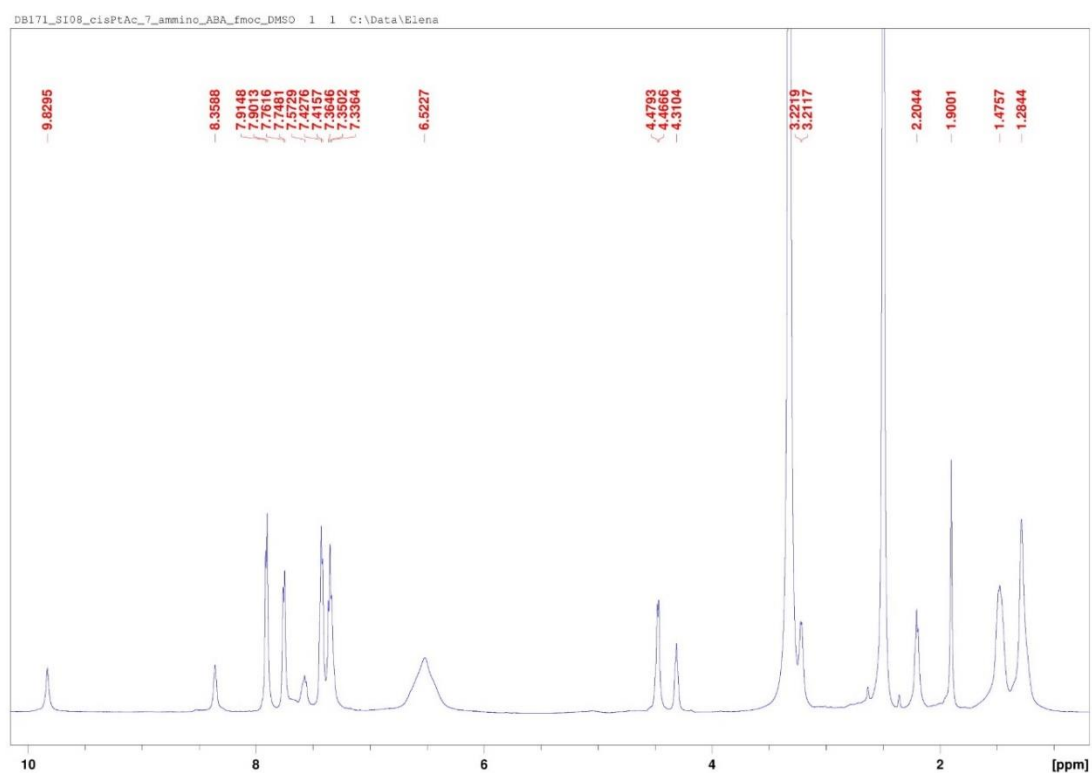

**Figure S21.** <sup>1</sup>H NMR spectrum of complex **7**.

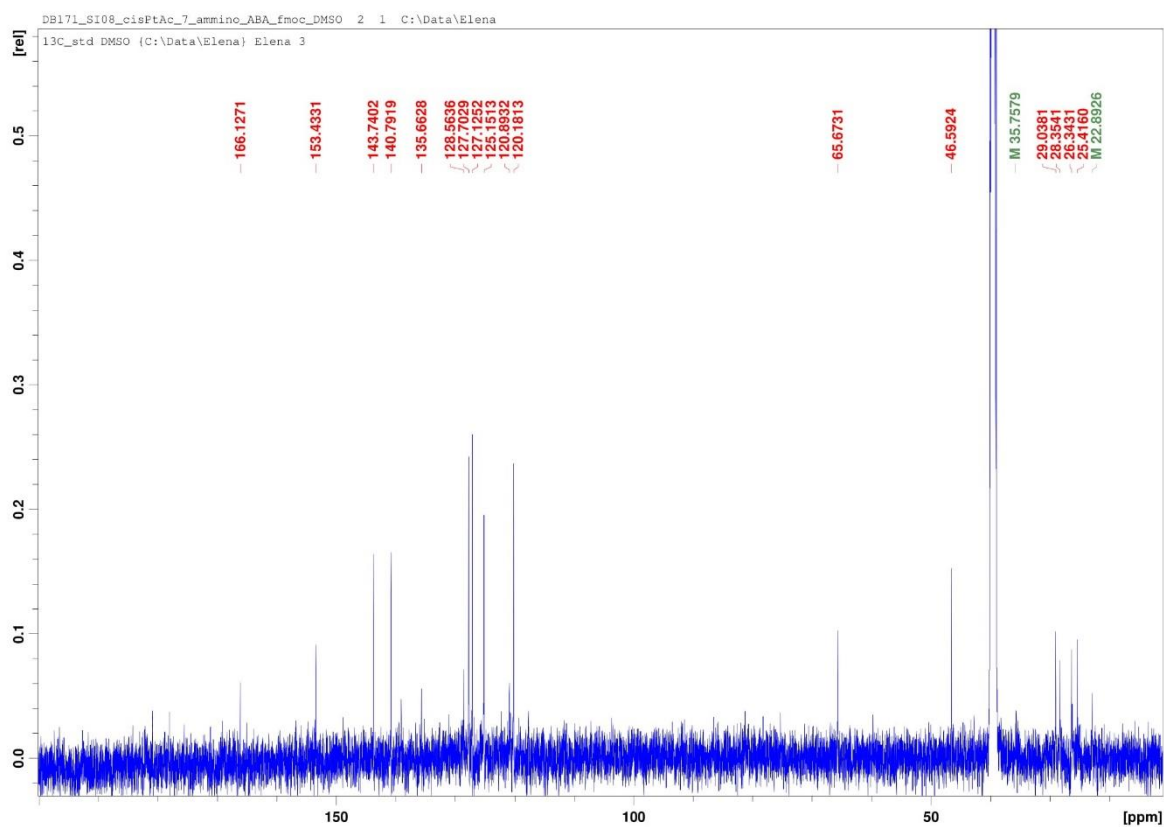

**Figure S22.**  $^{13}\text{C}$  NMR spectrum of complex **7**.

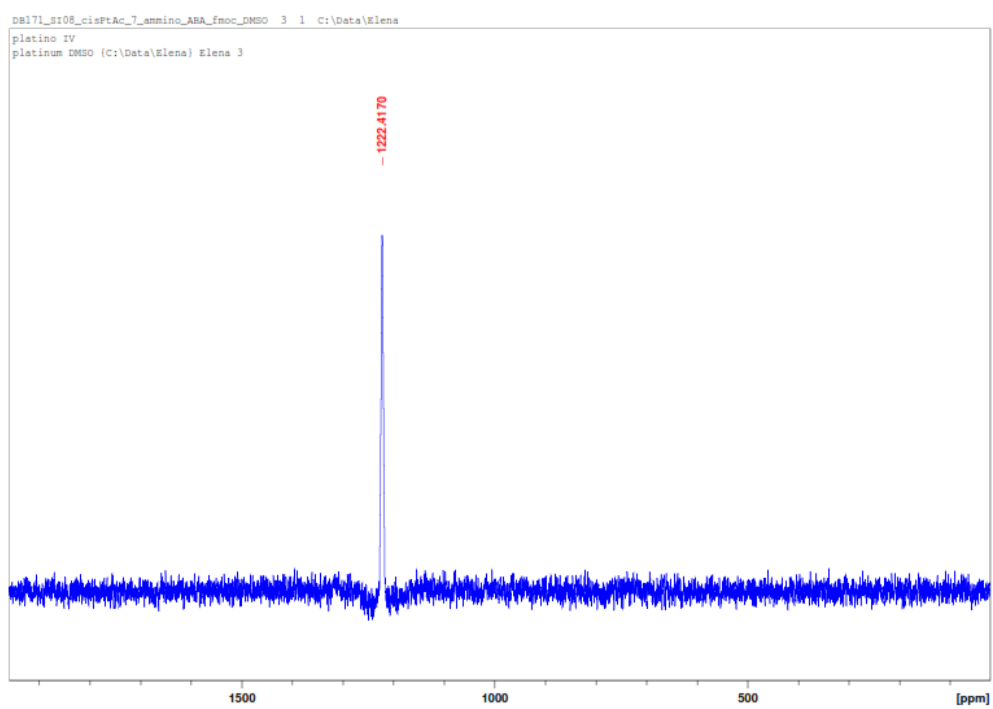

**Figure S23.**  $^{195}\text{Pt}$  NMR spectrum of complex **7**.

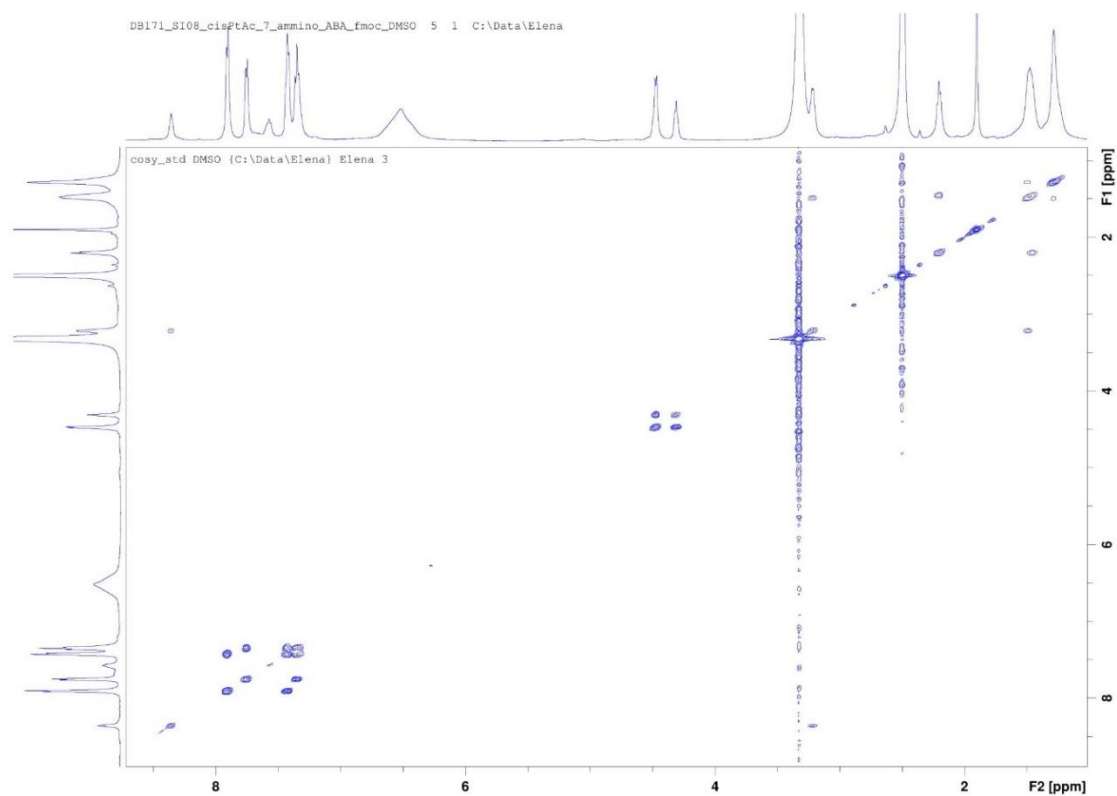

**Figure S24.** [ $^1\text{H}$ ,  $^1\text{H}$ ] COSY NMR spectrum of complex **7**.

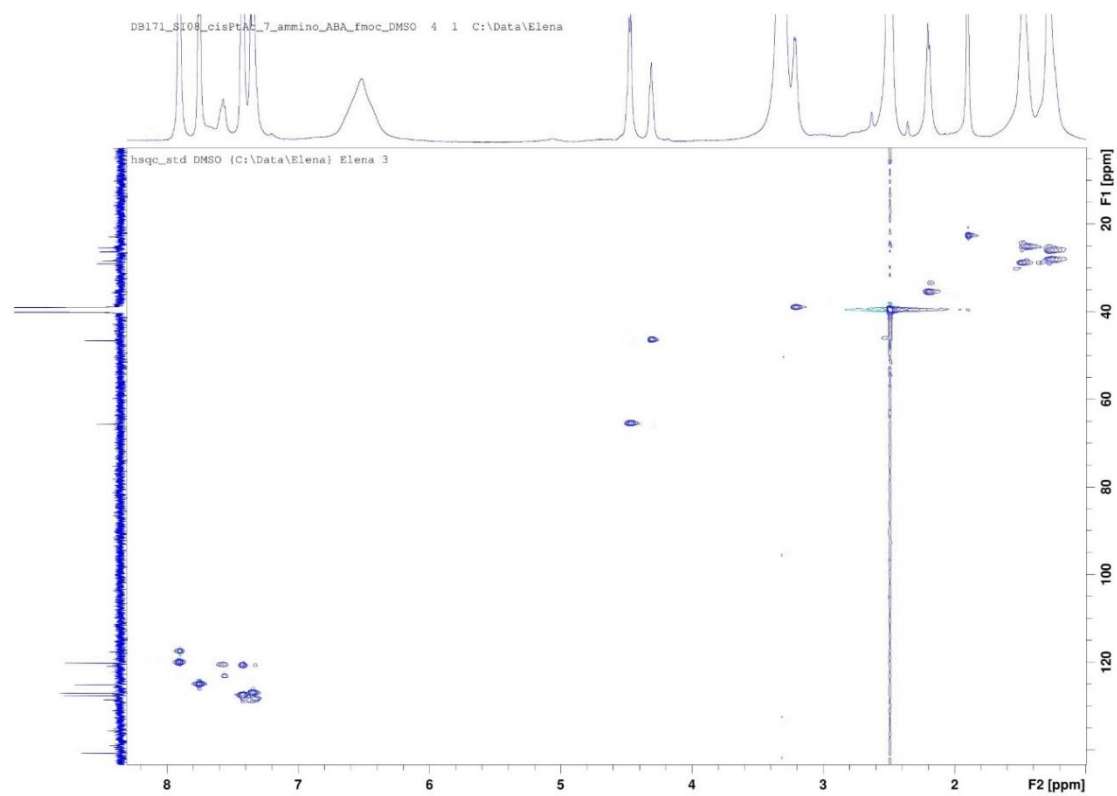

**Figure S25.** [ $^1\text{H}$ ,  $^{13}\text{C}$ ] HSQC NMR spectrum of complex **7**.

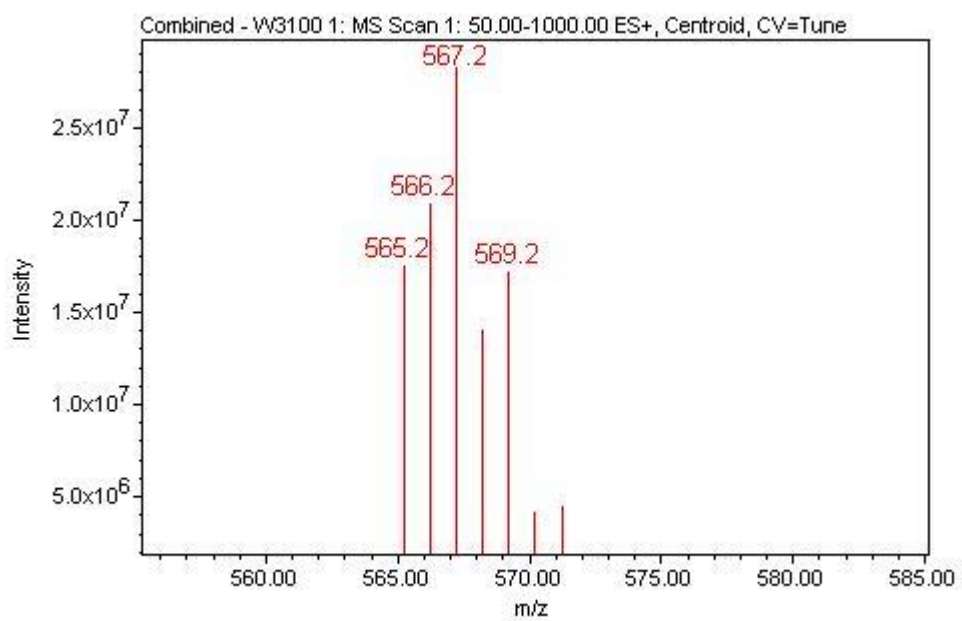

**Figure S26.** ESI-MS spectrum of complex **8**.

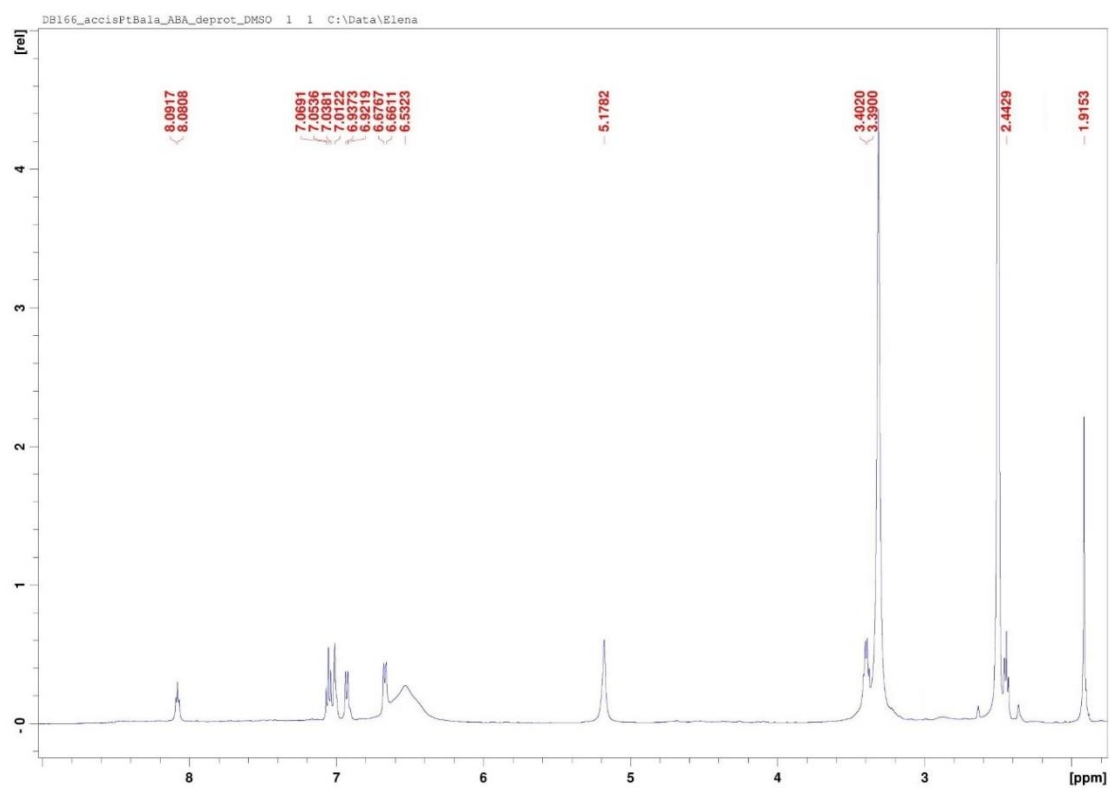

**Figure S27.** <sup>1</sup>H NMR spectrum of complex **8**.

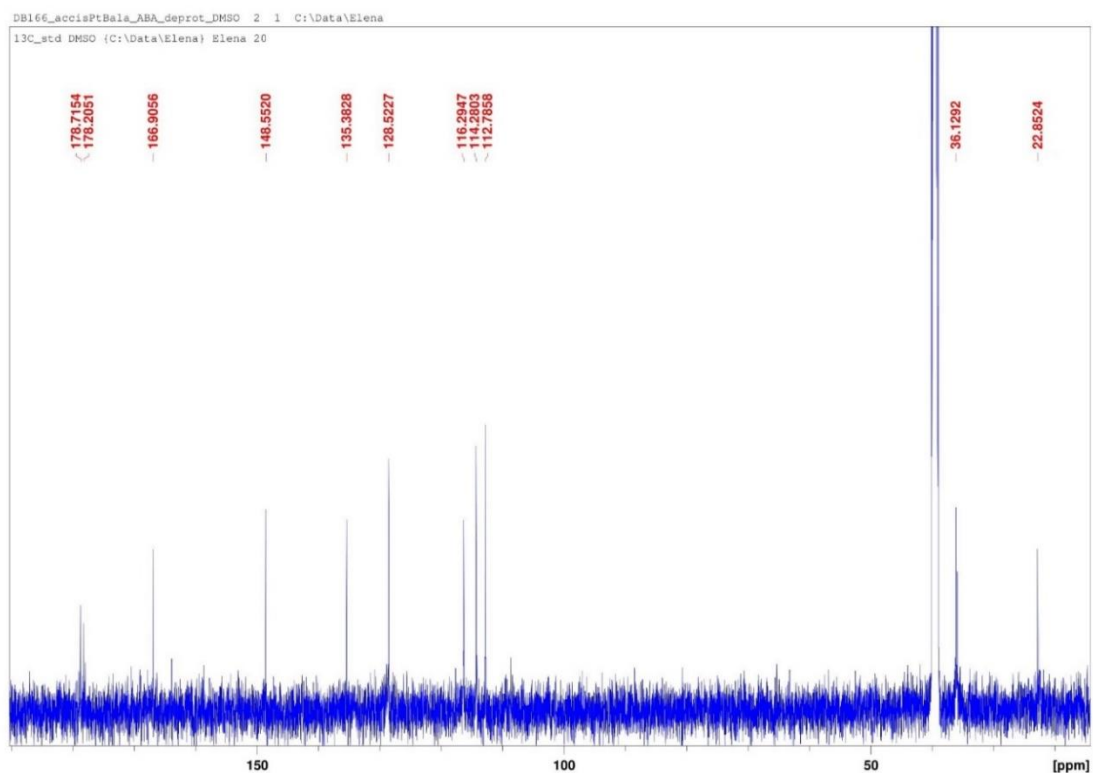

**Figure S28.**  $^{13}\text{C}$  NMR spectrum of complex **8**.

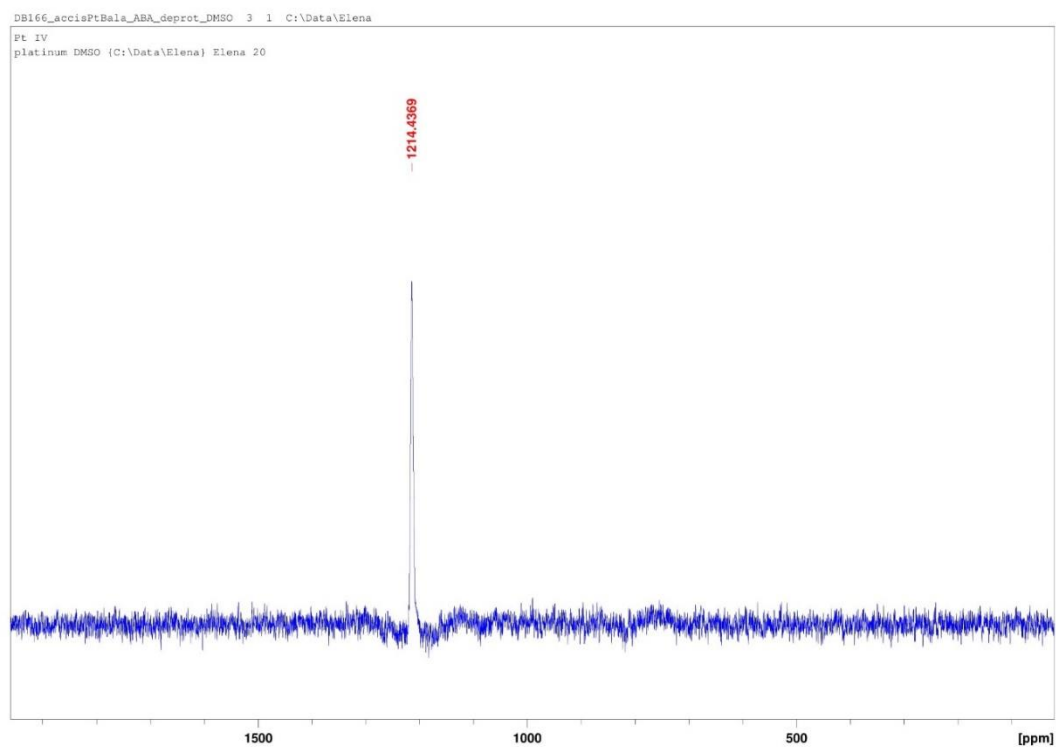

**Figure S29.**  $^{195}\text{Pt}$  NMR spectrum of complex **8**.



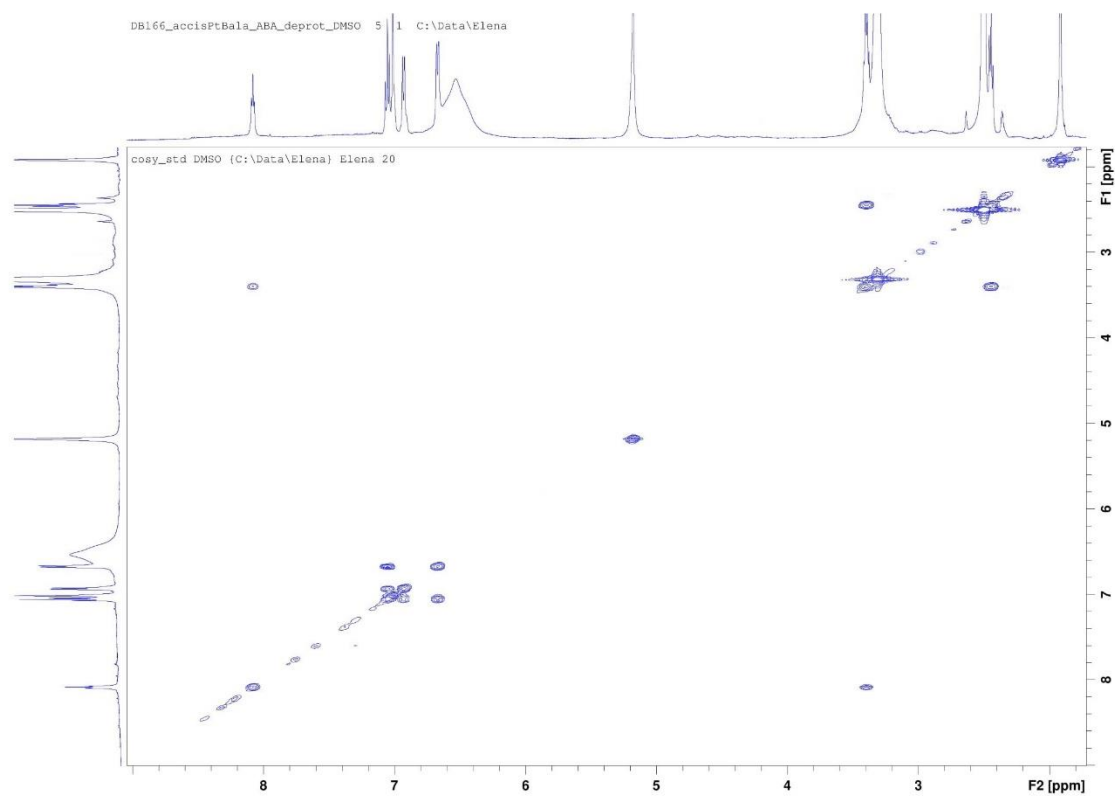

**Figure S30.** [ $^1\text{H}$ ,  $^1\text{H}$ ] COSY NMR spectrum of complex **8**.

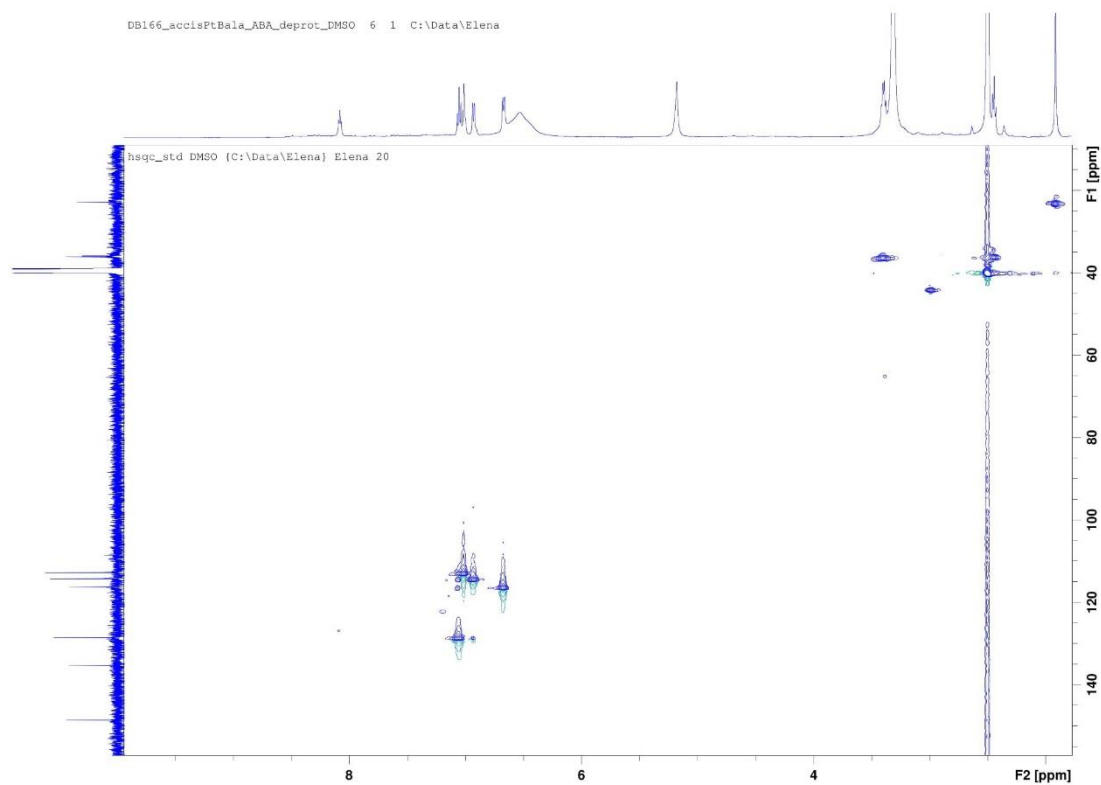

**Figure S31.** [ $^1\text{H}$ ,  $^{13}\text{C}$ ] HSQC NMR spectrum of complex **8**.

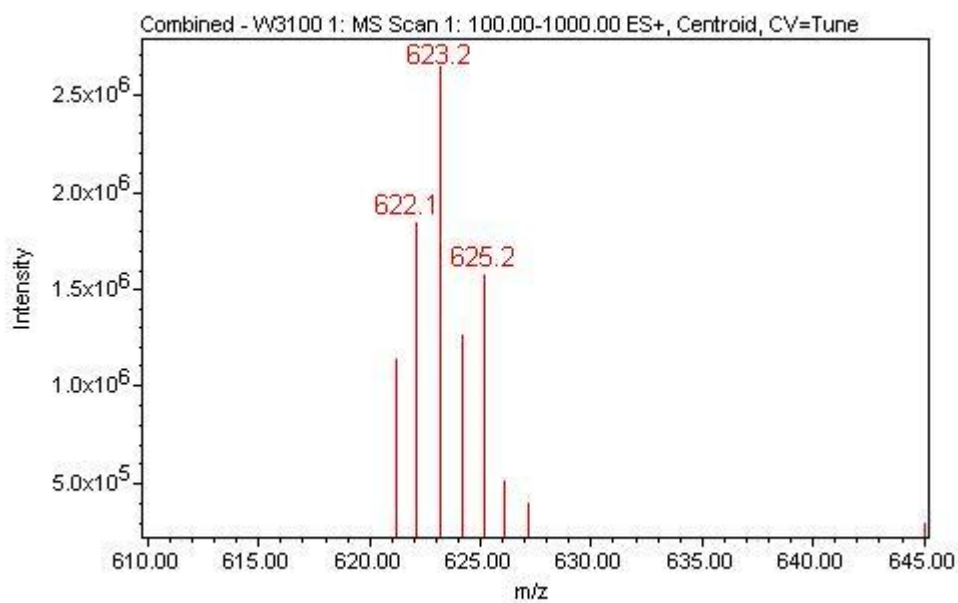

**Figure S32.** ESI-MS spectrum of complex **9**.

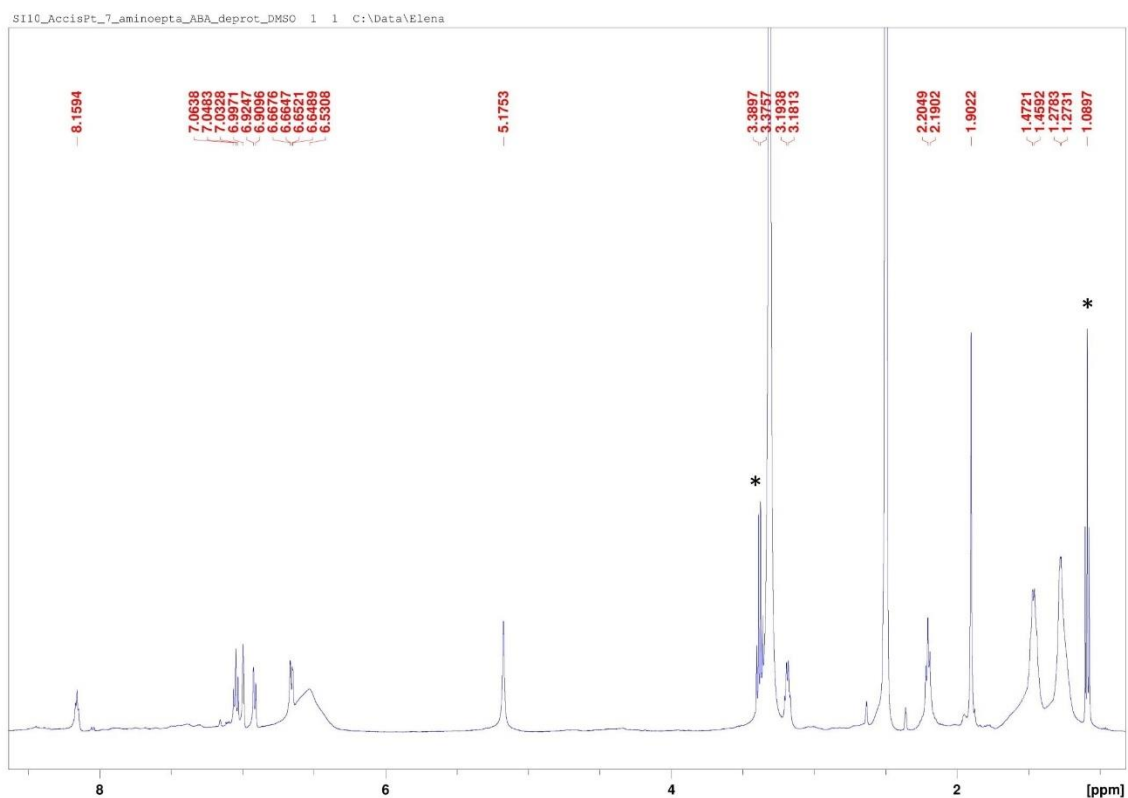

**Figure S33.** <sup>1</sup>H NMR spectrum of complex **9**. The signals of residual diethyl ether are visible (\*).

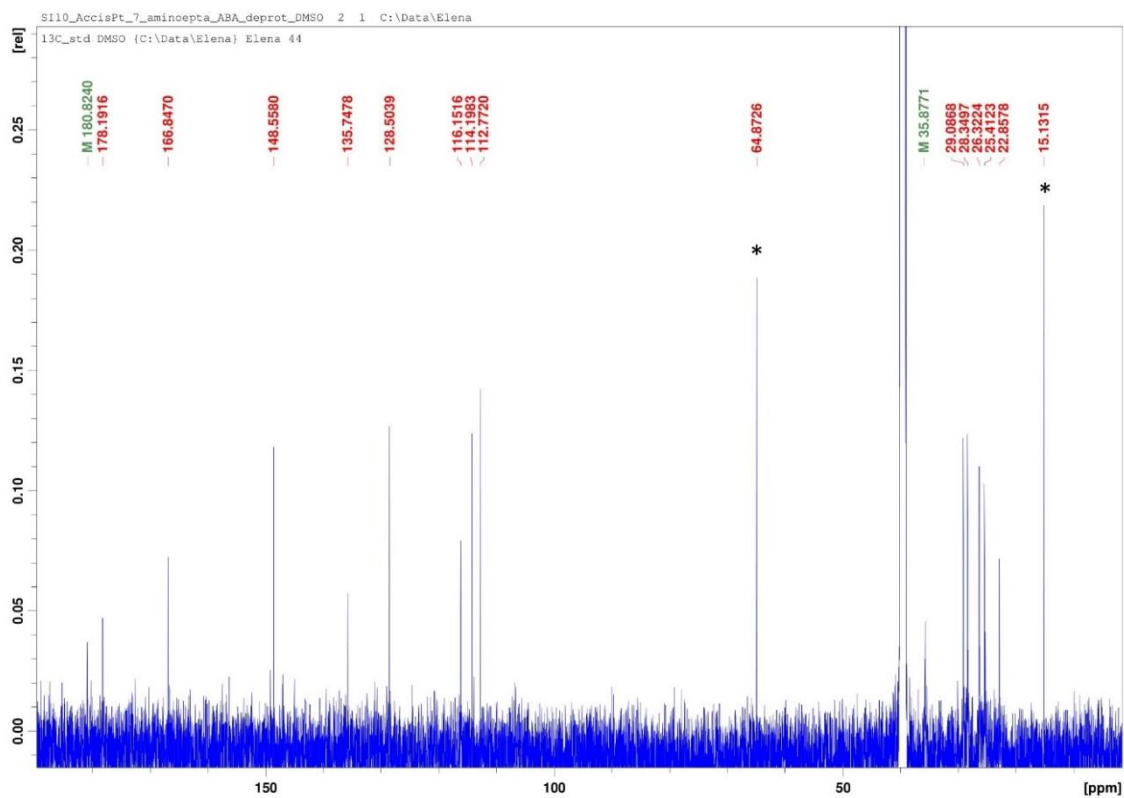

**Figure S34.**  $^{13}\text{C}$  NMR spectrum of complex **9**. The signals of residual diethyl ether are visible (\*).

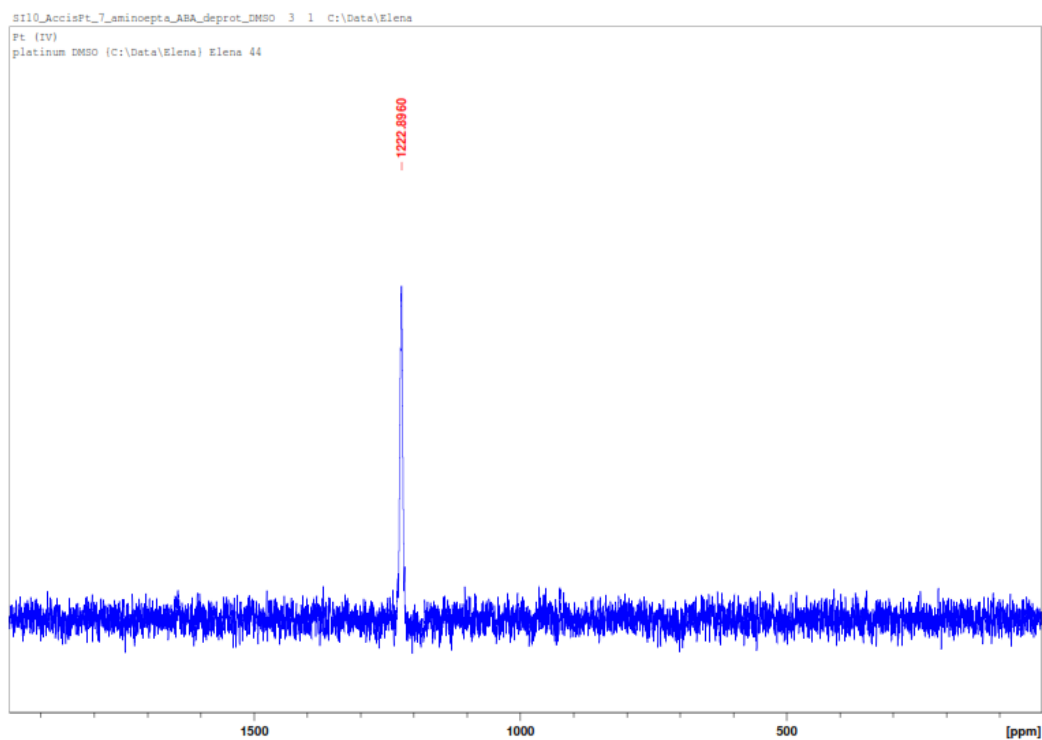

**Figure S35.**  $^{195}\text{Pt}$  NMR spectrum of complex **9**.

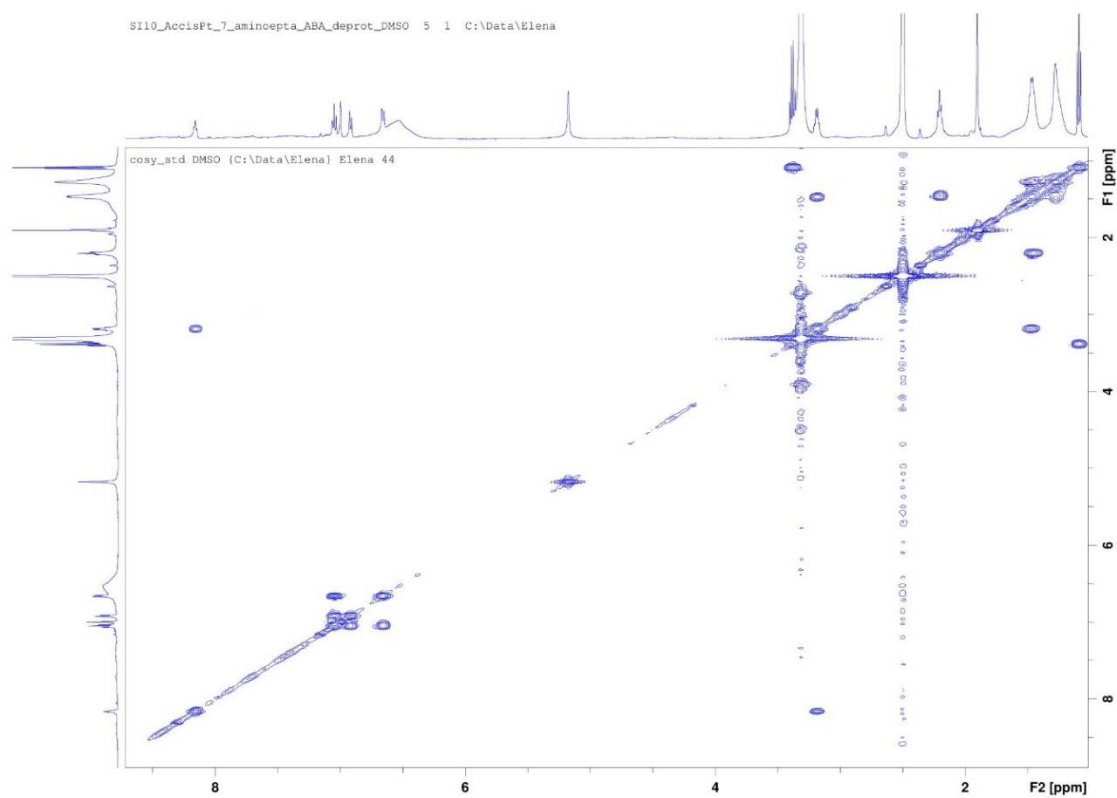

**Figure S36.** [ $^1\text{H}$ ,  $^1\text{H}$ ] COSY NMR spectrum of complex **9**.

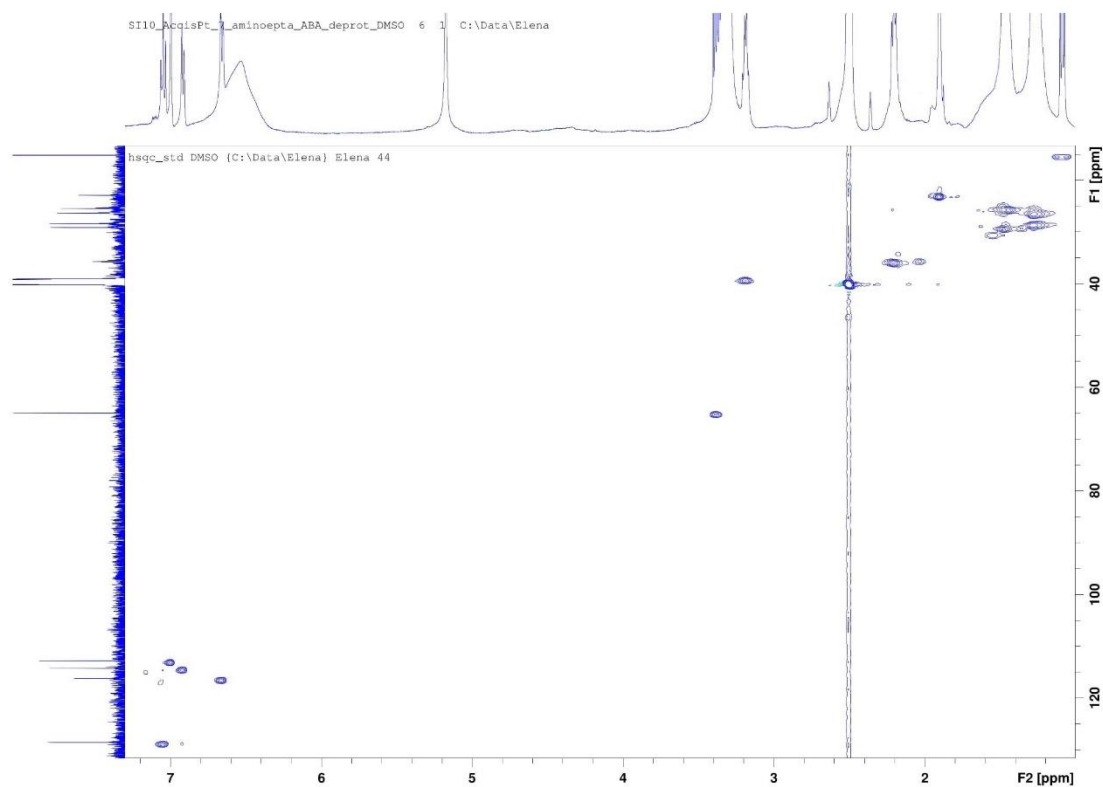

**Figure S37.** [ $^1\text{H}$ ,  $^{13}\text{C}$ ] HSQC NMR spectrum of complex **9**.
